# Supplementary material for: Identification of a sugarcane bacilliform virus promoter that is activated by drought stress in plants
Source: PubMed Central journal article supplement (PMC10965894; doi:10.1038/s42003-024-06075-y), 2024-03-26
Supplement: 42003_2024_6075_MOESM3_ESM.pdf [file 42003_2024_6075_MOESM3_ESM.pdf]

# Description of Additional Supplementary Files

**File name:** Supplementary data 1

**Description:** List of primers used for plasmid constructions in this study.

**File name:** Supplementary data 2

**Description:** Source data for graph from Main manuscript file.

**File name:** Supplementary data 3

**Description:** Source data for graph from Supplementary Information.
